# Supplementary material for: The impact of persistent colonization by Vibrio fischeri on the metabolome of the host squid Euprymna scolopes
Source: Oxford University Press journal article supplement (doi:10.1242/jeb.212860), 2020-01-01
Supplement: jeb212860supp.pdf [file jeb212860supp.pdf]

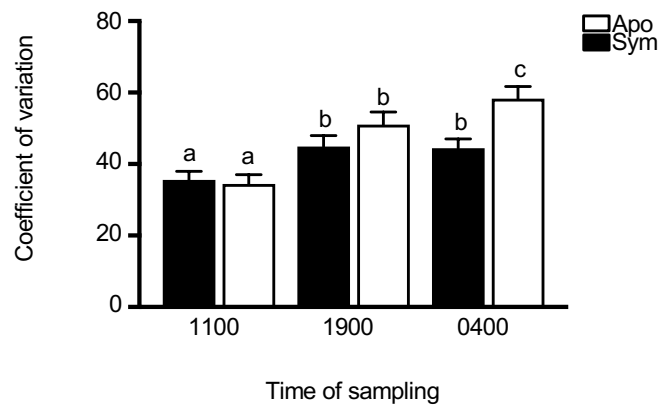

**Fig. S1. The absence of the symbiont results in increased variance of metabolite abundance in hemolymph.**

The average coefficient of variation for the relative abundance of all 145 metabolites under both colonization conditions and all three time points. Differing letters indicate statistical differences between groups (Kruskal-Wallis test with multiple comparisons). Mean values with error bars as S.E.M. are shown.

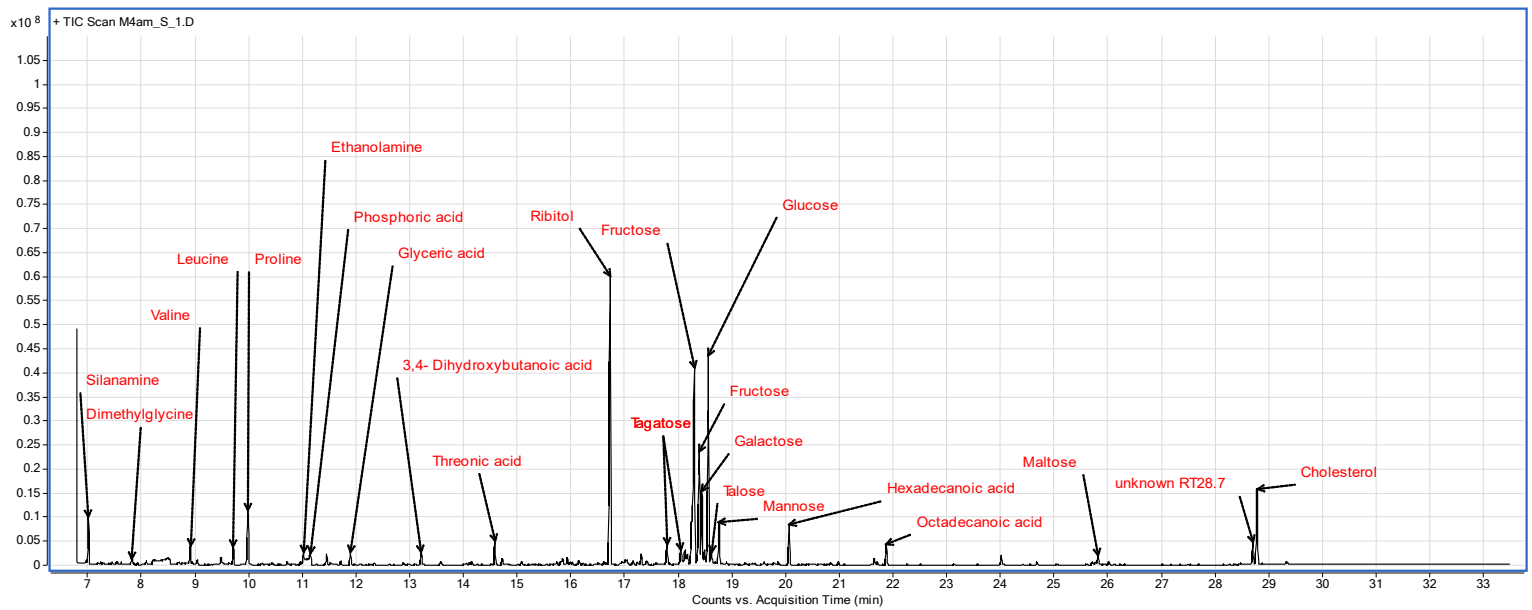

**Fig. S2. A representative sample of *E. scolopes* hemolymph.**

A GC-MS chromatogram of hemolymph collected at 0400 h from a SYM male; abundant metabolites are indicated in red.

Table S1

[Click here to Download Table S1](#)
